# Supplementary material
Source: publisher site journal article supplement (https://fesmj.pensoft.net/article/download/suppl/6071419/)
Supplement: Supplementary file 1

Archive with 20 entries (19 files):
- metaData.json
- ChallengeVarMeanDoses.r
- defaultSimulation.r
- Outbreak.r
- OutbreakVarMeanDoses.r
- model.r
- visualization.r
- workspace.RData
- sim.sedml
- simulations/
- simulations/defaultSimulation.r
- simulations/Outbreak.r
- simulations/ChallengeVarMeanDoses.r
- simulations/OutbreakVarMeanDoses.r
- README.txt
- model.sbml
- MASS_7.3-53.1.zip
- packages.json
- metadata.rdf
- manifest.xml
