# Supplementary material
Source: publisher site journal article supplement (https://fesmj.pensoft.net/article/download/suppl/6071419/)
Supplement: Supplementary file 1 [file  › ChallengeVarMeanDoses.r]

var_z_inf_ob <- 1.003
mean_w_ill_ob <- 6.241
mean_z_ill_ob <- -0.0086
mean_w_inf_ch <- -0.177
mean_z_inf_ch <- 0.054
Pexp <- 1
var_w_inf_ch <- 1.303
var_w_ill_ch <- 1.337
var_z_ill_ch <- 0.993
var_z_inf_ch <- 1.07
cov_wz_ill_ob <- 0.184
cov_wz_inf_ob <- -0.053
mean_w_inf_ob <- -0.226
dose <- 10^rnorm(1000, -1, 1.5 )
var_z_ill_ob <- 0.995
mean_w_ill_ch <- -2.744
mean_z_inf_ob <- 0.017
mean_z_ill_ch <- -0.00489
challenge <- TRUE
var_w_ill_ob <- 40.99
var_w_inf_ob <- 1.404
n_sim <- 50
cov_wz_inf_ch <- -0.041
cov_wz_ill_ch <- 0.01
