# Supplementary material
Source: publisher site journal article supplement (https://fesmj.pensoft.net/article/download/suppl/6071419/)
Supplement: Supplementary file 1 [file  › defaultSimulation.r]

dose <- rep(1,10000)
n_sim <- 50
Pexp <- 1
challenge <- TRUE
mean_w_inf_ch <- -0.177
mean_z_inf_ch <- 0.054
var_w_inf_ch <- 1.303
var_z_inf_ch <- 1.07
cov_wz_inf_ch <- -0.041
mean_w_ill_ch <- -2.744
mean_z_ill_ch <- -0.00489
var_w_ill_ch <- 1.337
var_z_ill_ch <- 0.993
cov_wz_ill_ch <- 0.01
mean_w_inf_ob <- -0.226
mean_z_inf_ob <- 0.017
var_w_inf_ob <- 1.404
var_z_inf_ob <- 1.003
cov_wz_inf_ob <- -0.053
mean_w_ill_ob <- 6.241
mean_z_ill_ob <- -0.0086
var_w_ill_ob <- 40.99
var_z_ill_ob <- 0.995
cov_wz_ill_ob <- 0.184
