# Supplementary material
Source: publisher site journal article supplement (https://fesmj.pensoft.net/article/download/suppl/6071419/)
Supplement: Supplementary file 1 [file  › manifest.xml]

<?xml version="1.0" encoding="UTF-8"?>
<omexManifest xmlns="http://identifiers.org/combine.specifications/omex-manifest">
  <content location="." format="http://identifiers.org/combine.specifications/omex" />
  <content location="./manifest.xml" format="http://identifiers.org/combine.specifications/omex-manifest" />
  <content location="./model.sbml" format="http://purl.org/NET/mediatypes/application/sbml+xml" />
  <content location="./visualization.r" format="http://purl.org/NET/mediatypes/application/r" />
  <content location="./defaultSimulation.r" format="http://purl.org/NET/mediatypes/application/r" />
  <content location="./MASS_7.3-53.1.zip" format="http://purl.org/NET/mediatypes/application/zip" />
  <content location="./simulations/OutbreakVarMeanDoses.r" format="http://purl.org/NET/mediatypes/application/r" />
  <content location="./metaData.json" format="https://www.iana.org/assignments/media-types/application/json" />
  <content location="./model.r" format="http://purl.org/NET/mediatypes/application/r" />
  <content location="./packages.json" format="https://www.iana.org/assignments/media-types/application/json" />
  <content location="./README.txt" format="http://purl.org/NET/mediatypes/text-xplain" />
  <content location="./ChallengeVarMeanDoses.r" format="http://purl.org/NET/mediatypes/application/r" />
  <content location="./sim.sedml" format="http://identifiers.org/combine.specifications/sed-ml" />
  <content location="./simulations/Outbreak.r" format="http://purl.org/NET/mediatypes/application/r" />
  <content location="./workspace.RData" format="http://purl.org/NET/mediatypes/text/x-RData" />
  <content location="./Outbreak.r" format="http://purl.org/NET/mediatypes/application/r" />
  <content location="./OutbreakVarMeanDoses.r" format="http://purl.org/NET/mediatypes/application/r" />
  <content location="./simulations/ChallengeVarMeanDoses.r" format="http://purl.org/NET/mediatypes/application/r" />
  <content location="./simulations/defaultSimulation.r" format="http://purl.org/NET/mediatypes/application/r" />
  <content location=".\metadata.rdf" format="http://identifiers.org/combine.specifications/omex-metadata" />
</omexManifest>
