# Supplementary material
Source: publisher site journal article supplement (https://fesmj.pensoft.net/article/download/suppl/6071419/)
Supplement: Supplementary file 1 [file  › metaData.json]

{"modelType":"genericModel","generalInformation":{"name":"Dose-response model for Campylobacter jejuni ","source":"PUBLISHED SCIENTIFIC STUDIES","identifier":"CampylobacterDRTeunis2018","author":[{"title":"","familyName":"Teunis","givenName":"Peter F.M.","email":"peter.teunis@emory.edu","telephone":"","streetAddress":"","country":"United States","zipCode":"","region":"","timeZone":"","gender":"","note":"","organization":"Rollins School of Public Health, Emory University"},{"title":"","familyName":"Bonacic Marinovic","givenName":"Axel","email":" ","telephone":"","streetAddress":"","country":"Netherlands","zipCode":"","region":"","timeZone":"","gender":"","note":"","organization":"National Institute for Public Health and the Environment"},{"title":"","familyName":"Tribble","givenName":"David R.","email":" ","telephone":"","streetAddress":"","country":"United States","zipCode":"","region":"","timeZone":"","gender":"","note":"","organization":"Uniformed Services University of the Health Sciences"},{"title":"","familyName":"Porter","givenName":"Chad K. ","email":" ","telephone":"","streetAddress":"","country":"United States","zipCode":"","region":"","timeZone":"","gender":"","note":"","organization":"Uniformed Services University of the Health Sciences"},{"title":"","familyName":"Swart","givenName":"Arno","email":" ","telephone":"","streetAddress":"","country":"Netherlands","zipCode":"","region":"","timeZone":"","gender":"","note":"","organization":"National Institute of Public Health and the Environment"}],"creator":[{"title":"","familyName":"Bonacic Marinovic","givenName":"Axel","email":"axel.bonacic.marinovic@rivm.nl","telephone":"","streetAddress":"","country":"Netherlands","zipCode":"","region":"","timeZone":"","gender":"","note":"","organization":"National Institute of Public Health and the Environment"},{"title":"","familyName":"Georgiadis","givenName":"Stylianos","email":"sgeo@dtu.dk","telephone":"","streetAddress":"","country":"Denmark","zipCode":"","region":"","timeZone":"","gender":"","note":"","organization":"Technical University of Denmark"},{"title":"","familyName":"Nauta","givenName":"Maarten ","email":"maana@food.dtu.dk","telephone":"","streetAddress":"","country":"Denmark","zipCode":"","region":"","timeZone":"","gender":"","note":"","organization":"Technical University of Denmark"},{"title":"","familyName":"Sundermann","givenName":"Esther M.","email":"esther-maria.sundermann@bfr.bund.de","telephone":"","streetAddress":"","country":"Germany","zipCode":"","region":"","timeZone":"","gender":"","note":"","organization":"German Federal Institute for Risk Assessment"},{"title":"","familyName":"Swart","givenName":"Arno ","email":"arno.swart@rivm.nl","telephone":"","streetAddress":"","country":"Netherlands","zipCode":"","region":"","timeZone":"","gender":"","note":"","organization":"National Institute for Public Health and the Environment"},{"title":"","familyName":"Teunis","givenName":"Peter F.M.","email":"peter.teunis@emory.edu","telephone":"","streetAddress":"","country":"United States","zipCode":"","region":"","timeZone":"","gender":"","note":"","organization":"Rollins School of Public Health, Emory University"}],"creationDate":[2019,2,15],"modificationDate":[null],"rights":"Creative Commons Attribution 4.0","availability":"Open access","url":"","format":".fskx","reference":[{"isReferenceDescription":false,"date":[2018,2,8],"pmid":"","doi":"https://doi.org/10.1016/j.epidem.2018.02.001","authorList":"Teunis, P.F.M., Bonacic Marinovic, A., Tribble, D.R., Porter, C.K., & Swart, A.","title":"Acute illness from Campylobacter jejuni may require high doses while infection occurs at low doses","journal":"","volume":"24","issue":"0","status":"Published","website":"https://www.sciencedirect.com/science/article/pii/S1755436517301366?via%3Dihub","comment":"","abstract":"Data from a set of different studies on the infectivity and pathogenicity of Campylobacter jejuni were analyzed with a multilevel model, allowing for effects of host species (nonhuman primates and humans) and differentstrains of the pathogen.All challenge studies involved high doses of the pathogen, resulting in all exposed subjects to become infected. In only one study a dose response effect (increasing trend with dose) for infection was observed. Highsusceptibility to infection with C. jejuni was found in a joint analysis of outbreaks and challenge studies. For that reason four outbreaks, associated with raw milk consumption, were also included in the present study. The high doses used for inoculation did not cause all infected subjects to develop acute enteric symptoms. The observed outcomes are consistent with a dose response effect for acute symptoms among infected subjects: a conditional illness dose response relation. Nonhuman primates and human volunteers did not appear to have different susceptibilities for developing enteric symptoms, but exposure in outbreaks (raw milk) did lead to a higher probability of symptomatic campylobacteriosis."}],"language":"English","software":"FSK-Lab","languageWrittenIn":"R","modelCategory":{"modelClass":"","modelSubClass":[],"modelClassComment":"","basicProcess":["Probability of infection and illness "]},"status":"Uncurated","objective":"The objective of the model is to estimate the probability of infection and illness after ingestion of a dose of Campylobacter jejuni.","description":"The dose-response model provides the probability of infection and illness as a function of the exposure, i.e., the ingested dose of Campylobacter jejuni. Model parameters are based on datasets from human and primate challenge studies and outbreaks."},"scope":{"product":[{"name":"Any product","description":"Any product","unit":"[]","method":[null],"packaging":[null],"treatment":[null]}],"hazard":[{"type":"Microorganisms","name":"Campylobacter jejuni","description":"","unit":"CFU","adverseEffect":"Asymptomatic or symptomatic infection with Campylobacter jejuni (campylobacteriosis)","sourceOfContamination":"","benchmarkDose":"","maximumResidueLimit":"","noObservedAdverseAffectLevel":"","lowestObservedAdverseAffectLevel":"","acceptableOperatorsExposureLevel":"","acuteReferenceDose":"","acceptableDailyIntake":"","indSum":""}],"populationGroup":[{"name":"General population or outbreaks","targetPopulation":"Two target populations are defined: the general population and groups involved in a food-borne outbreak.","populationSpan":[],"populationDescription":[],"populationAge":[],"populationGender":"","specialDietGroups":[],"patternConsumption":[],"region":[],"country":[],"populationRiskFactor":[],"season":[]}],"generalComment":"The dose-response model provides the probability of infection and illness as a function of the exposure, i.e., the ingested dose of Campylobacter jejuni. Model parameters are based on datasets from human and primate challenge studies and outbreaks.","temporalInformation":"","spatialInformation":[]},"dataBackground":{"study":{"identifier":"TeunisEtAl2018","title":"Acute illness from Campylobacter jejuni may require high doses while infection occurs at low doses","description":"Data from a set of different studies on the infectivity and pathogenicity of Campylobacter jejuni were analysed with a multilevel model. This allowed us to include effects of host species (non-human primates and humans), different strains of the pathogen, and differentiation between outbreak and non-outbreak settings. To this end, three groups of studies were included: (1) four controlled human infection studies (challenge studies) involving three distinct strains (81-176, CG8421, and A3249), (2) four studies on outbreaks of unknown strains and, in one case, strain 81-176, and (3) five challenge studies in three species of non-human primates of strains 81-176, 78-37, and V212X. All studies recorded both asymptomatic infection and illness as endpoints. The data are used to parameterise the dose-response model; see Section \"Material and methods\" and Teunis et al. (2018) for details.","designType":"","assayMeasurementType":"","assayTechnologyType":"","assayTechnologyPlatform":"","accreditationProcedureForTheAssayTechnology":"","protocolName":"","protocolDescription":"","protocolURI":"https://www.sciencedirect.com/science/article/pii/S1755436517301366?via%3Dihub","protocolVersion":"","protocolParametersName":"","protocolComponentsName":"","protocolComponentsType":""},"studySample":[],"dietaryAssessmentMethod":[],"laboratory":[],"assay":[]},"modelMath":{"parameter":[{"id":"dose","classification":"INPUT","name":"Doses","description":"A range (vector) of mean doses of Campylobacter jejuni","unit":"CFU","unitCategory":"","dataType":"DOUBLE","source":"Article","subject":"","distribution":"","value":"rep(1,10000)","variabilitySubject":"","minValue":"0","maxValue":"","error":""},{"id":"n_sim","classification":"INPUT","name":"Number of parameter simulations","description":"Number of simulations","unit":"[]","unitCategory":"Dimensionless Quantity","dataType":"INTEGER","source":"Article","subject":"","distribution":"","value":"50","variabilitySubject":"","minValue":"1","maxValue":"","error":""},{"id":"Pexp","classification":"INPUT","name":"Probability of exposure","description":"In exposure models, the Pexp is often called the prevalence. ","unit":"[Probability]","unitCategory":"Dimensionless Quantity","dataType":"DOUBLE","source":"Data","subject":"","distribution":"","value":"1","variabilitySubject":"","minValue":"0","maxValue":"1","error":""},{"id":"challenge","classification":"INPUT","name":"Analysis done on the basis of challenge study data or outbreak data","description":"TRUE if challenge, FALSE if outbreak","unit":"[]","unitCategory":"Dimensionless Quantity","dataType":"BOOLEAN","source":"based on available data","subject":"","distribution":"","value":"TRUE","variabilitySubject":"","minValue":"","maxValue":"","error":""},{"id":"mean_w_inf_ch","classification":"INPUT","name":"Mean of w1","description":" w1 is a measure of infectivity (location). Value of the challenge-scenario.","unit":"[]","unitCategory":"Dimensionless Quantity","dataType":"DOUBLE","source":"Article","subject":"","distribution":"","value":"-0.177","variabilitySubject":"","minValue":"","maxValue":"","error":""},{"id":"mean_z_inf_ch","classification":"INPUT","name":"Mean of z1","description":"z1 is a measure of variation in infectivity (spread). Value of the challenge-scenario.","unit":"[]","unitCategory":"Dimensionless Quantity","dataType":"DOUBLE","source":"Article","subject":"","distribution":"","value":"0.054","variabilitySubject":"","minValue":"","maxValue":"","error":""},{"id":"var_w_inf_ch","classification":"INPUT","name":"Variance of w1","description":"w1 is a measure of infectivity (location). Value of the challenge-scenario.","unit":"[]","unitCategory":"Dimensionless Quantity","dataType":"DOUBLE","source":"Article","subject":"","distribution":"","value":"1.303","variabilitySubject":"","minValue":"","maxValue":"","error":""},{"id":"var_z_inf_ch","classification":"INPUT","name":"Variance of z1","description":"z1 is a measure of variation in infectivity (spread). Value of the challenge-scenario.","unit":"[]","unitCategory":"Dimensionless Quantity","dataType":"DOUBLE","source":"Article","subject":"","distribution":"","value":"1.07","variabilitySubject":"","minValue":"","maxValue":"","error":""},{"id":"cov_wz_inf_ch","classification":"INPUT","name":"Covariance of (w1, z1)","description":"w1 is a measure of infectivity (location) and z1 is a measure of variation in infectivity (spread). Value of the challenge-scenario.","unit":"[]","unitCategory":"Dimensionless Quantity","dataType":"DOUBLE","source":"Article","subject":"","distribution":"","value":"-0.041","variabilitySubject":"","minValue":"","maxValue":"","error":""},{"id":"mean_w_ill_ch","classification":"INPUT","name":"Mean of w2","description":"w2 is a location parameter. Value of the challenge-scenario.","unit":"[]","unitCategory":"Dimensionless Quantity","dataType":"DOUBLE","source":"Article","subject":"","distribution":"","value":"-2.744","variabilitySubject":"","minValue":"","maxValue":"","error":""},{"id":"mean_z_ill_ch","classification":"INPUT","name":"Mean of z2","description":"z2 is a spread parameter. Value of the challenge-scenario.","unit":"[]","unitCategory":"Dimensionless Quantity","dataType":"DOUBLE","source":"Article","subject":"","distribution":"","value":"-0.00489","variabilitySubject":"","minValue":"","maxValue":"","error":""},{"id":"var_w_ill_ch","classification":"INPUT","name":"Variance of w2","description":"w2 is a location parameter. Value of the challenge-scenario.","unit":"[]","unitCategory":"Dimensionless Quantity","dataType":"DOUBLE","source":"Article","subject":"","distribution":"","value":"1.337","variabilitySubject":"","minValue":"","maxValue":"","error":""},{"id":"var_z_ill_ch","classification":"INPUT","name":"Variance of z2","description":"z2 is a spread parameter. Value of the challenge-scenario.","unit":"[]","unitCategory":"Dimensionless Quantity","dataType":"DOUBLE","source":"Article","subject":"","distribution":"","value":"0.993","variabilitySubject":"","minValue":"","maxValue":"","error":""},{"id":"cov_wz_ill_ch","classification":"INPUT","name":"Covariance of (w2, z2)","description":"w2 is a location parameter and z2 is a spread parameter. Value of the challenge-scenario.","unit":"[]","unitCategory":"Dimensionless Quantity","dataType":"DOUBLE","source":"Article","subject":"","distribution":"","value":"0.01","variabilitySubject":"","minValue":"","maxValue":"","error":""},{"id":"mean_w_inf_ob","classification":"INPUT","name":"Mean of w1","description":"w1 is a measure of infectivity (location). Value of the outbreak- scenario.","unit":"[]","unitCategory":"Dimensionless Quantity","dataType":"DOUBLE","source":"Article","subject":"","distribution":"","value":"-0.226","variabilitySubject":"","minValue":"","maxValue":"","error":""},{"id":"mean_z_inf_ob","classification":"INPUT","name":"Mean of z1","description":"z1 is a measure of variation in infectivity (spread). Value of the outbreak-scenario.","unit":"[]","unitCategory":"Dimensionless Quantity","dataType":"DOUBLE","source":"Article","subject":"","distribution":"","value":"0.017","variabilitySubject":"","minValue":"","maxValue":"","error":""},{"id":"var_w_inf_ob","classification":"INPUT","name":"Variance of w1","description":"w1 is a measure of infectivity (location). Value of the outbreak-scenario.","unit":"[]","unitCategory":"Dimensionless Quantity","dataType":"DOUBLE","source":"Article","subject":"","distribution":"","value":"1.404","variabilitySubject":"","minValue":"","maxValue":"","error":""},{"id":"var_z_inf_ob","classification":"INPUT","name":"Variance of z1","description":"z1 is a measure of variation in infectivity (spread). Value of the outbreak-scenario.","unit":"[]","unitCategory":"Dimensionless Quantity","dataType":"DOUBLE","source":"Article","subject":"","distribution":"","value":"1.003","variabilitySubject":"","minValue":"","maxValue":"","error":""},{"id":"cov_wz_inf_ob","classification":"INPUT","name":"Covariance of (w1, z1)","description":"w1 is a measure of infectivity (location) and z1 is a measure of variation in infectivity (spread). Value of the outbreak-scenario.","unit":"[]","unitCategory":"Dimensionless Quantity","dataType":"DOUBLE","source":"Article","subject":"","distribution":"","value":"-0.053","variabilitySubject":"","minValue":"","maxValue":"","error":""},{"id":"mean_w_ill_ob","classification":"INPUT","name":"Mean of w2","description":"w2 is a location parameter. Value of the outbreak-scenario.","unit":"[]","unitCategory":"Dimensionless Quantity","dataType":"DOUBLE","source":"Article","subject":"","distribution":"","value":"6.241","variabilitySubject":"","minValue":"","maxValue":"","error":""},{"id":"mean_z_ill_ob","classification":"INPUT","name":"Mean of z2","description":"z2 is a spread parameter. Value of the outbreak-scenario.","unit":"[]","unitCategory":"Dimensionless Quantity","dataType":"DOUBLE","source":"Article","subject":"","distribution":"","value":"-0.0086","variabilitySubject":"","minValue":"","maxValue":"","error":""},{"id":"var_w_ill_ob","classification":"INPUT","name":"Variance of w2","description":"w2 is a location parameter. Value of the outbreak-scenario.","unit":"[]","unitCategory":"Dimensionless Quantity","dataType":"DOUBLE","source":"Article","subject":"","distribution":"","value":"40.99","variabilitySubject":"","minValue":"","maxValue":"","error":""},{"id":"var_z_ill_ob","classification":"INPUT","name":"Variance of z2","description":"z2 is a spread parameter. Value of the outbreak-scenario.","unit":"[]","unitCategory":"Dimensionless Quantity","dataType":"DOUBLE","source":"Article","subject":"","distribution":"","value":"0.995","variabilitySubject":"","minValue":"","maxValue":"","error":""},{"id":"cov_wz_ill_ob","classification":"INPUT","name":"Covariance of (w2, z2)","description":"w2 is a location parameter and z2 is a spread parameter. Value of the outbreak-scenario.","unit":"[]","unitCategory":"Dimensionless Quantity","dataType":"DOUBLE","source":"Article","subject":"","distribution":"","value":"0.184","variabilitySubject":"","minValue":"","maxValue":"","error":""},{"id":"Qillmean","classification":"OUTPUT","name":"Mean probability of illness for each simulation over all doses","description":"","unit":"[Probability]","unitCategory":"","dataType":"VECTOROFNUMBERS","source":"","subject":"","distribution":"","value":"","variabilitySubject":"","minValue":"0","maxValue":"1","error":""},{"id":"Qinfmean","classification":"OUTPUT","name":"Mean probability of infection for each simulation over all doses","description":"","unit":"[Probability]","unitCategory":"","dataType":"VECTOROFNUMBERS","source":"","subject":"","distribution":"","value":"","variabilitySubject":"","minValue":"0","maxValue":"1","error":""}],"qualityMeasures":[{"sse":0,"mse":0,"rmse":0,"aic":0,"bic":0}],"modelEquation":[],"fittingProcedure":"The used parameters are derived from empirical data using Bayesian inference (see Teunis et al., 2018, Epidemics for details).","exposure":[],"event":[]}}
