# Supplementary material
Source: publisher site journal article supplement (https://fesmj.pensoft.net/article/download/suppl/6071419/)
Supplement: Supplementary file 1 [file  › model.sbml]

<?xml version='1.0' encoding='UTF-8' standalone='no'?>
<sbml xmlns="http://www.sbml.org/sbml/level3/version1/core" level="3" version="1" xmlns:fsk="https://foodrisklabs.bfr.bund.de/wp-content/uploads/2017/01/FSK-ML_guidance_document_021216.pdf">
  <model id="model">
    <listOfParameters>
      <parameter constant="false" id="dose" name="Doses">
        <annotation>
  <fsk:parameter value="rep(1,10000)"/>
        </annotation>
            </parameter>
      <parameter constant="false" id="n_sim" name="Number of parameter simulations">
        <annotation>
  <fsk:parameter value="50"/>
        </annotation>
            </parameter>
      <parameter constant="false" id="Pexp" name="Probability of exposure">
        <annotation>
  <fsk:parameter value="1"/>
        </annotation>
            </parameter>
      <parameter constant="false" id="challenge" name="Analysis done on the basis of challenge study data or outbreak data">
        <annotation>
  <fsk:parameter value="TRUE"/>
        </annotation>
            </parameter>
      <parameter constant="false" id="mean_w_inf_ch" name="Mean of w1">
        <annotation>
  <fsk:parameter value="-0.177"/>
        </annotation>
            </parameter>
      <parameter constant="false" id="mean_z_inf_ch" name="Mean of z1">
        <annotation>
  <fsk:parameter value="0.054"/>
        </annotation>
            </parameter>
      <parameter constant="false" id="var_w_inf_ch" name="Variance of w1">
        <annotation>
  <fsk:parameter value="1.303"/>
        </annotation>
            </parameter>
      <parameter constant="false" id="var_z_inf_ch" name="Variance of z1">
        <annotation>
  <fsk:parameter value="1.07"/>
        </annotation>
            </parameter>
      <parameter constant="false" id="cov_wz_inf_ch" name="Covariance of (w1, z1)">
        <annotation>
  <fsk:parameter value="-0.041"/>
        </annotation>
            </parameter>
      <parameter constant="false" id="mean_w_ill_ch" name="Mean of w2">
        <annotation>
  <fsk:parameter value="-2.744"/>
        </annotation>
            </parameter>
      <parameter constant="false" id="mean_z_ill_ch" name="Mean of z2">
        <annotation>
  <fsk:parameter value="-0.00489"/>
        </annotation>
            </parameter>
      <parameter constant="false" id="var_w_ill_ch" name="Variance of w2">
        <annotation>
  <fsk:parameter value="1.337"/>
        </annotation>
            </parameter>
      <parameter constant="false" id="var_z_ill_ch" name="Variance of z2">
        <annotation>
  <fsk:parameter value="0.993"/>
        </annotation>
            </parameter>
      <parameter constant="false" id="cov_wz_ill_ch" name="Covariance of (w2, z2)">
        <annotation>
  <fsk:parameter value="0.01"/>
        </annotation>
            </parameter>
      <parameter constant="false" id="mean_w_inf_ob" name="Mean of w1">
        <annotation>
  <fsk:parameter value="-0.226"/>
        </annotation>
            </parameter>
      <parameter constant="false" id="mean_z_inf_ob" name="Mean of z1">
        <annotation>
  <fsk:parameter value="0.017"/>
        </annotation>
            </parameter>
      <parameter constant="false" id="var_w_inf_ob" name="Variance of w1">
        <annotation>
  <fsk:parameter value="1.404"/>
        </annotation>
            </parameter>
      <parameter constant="false" id="var_z_inf_ob" name="Variance of z1">
        <annotation>
  <fsk:parameter value="1.003"/>
        </annotation>
            </parameter>
      <parameter constant="false" id="cov_wz_inf_ob" name="Covariance of (w1, z1)">
        <annotation>
  <fsk:parameter value="-0.053"/>
        </annotation>
            </parameter>
      <parameter constant="false" id="mean_w_ill_ob" name="Mean of w2">
        <annotation>
  <fsk:parameter value="6.241"/>
        </annotation>
            </parameter>
      <parameter constant="false" id="mean_z_ill_ob" name="Mean of z2">
        <annotation>
  <fsk:parameter value="-0.0086"/>
        </annotation>
            </parameter>
      <parameter constant="false" id="var_w_ill_ob" name="Variance of w2">
        <annotation>
  <fsk:parameter value="40.99"/>
        </annotation>
            </parameter>
      <parameter constant="false" id="var_z_ill_ob" name="Variance of z2">
        <annotation>
  <fsk:parameter value="0.995"/>
        </annotation>
            </parameter>
      <parameter constant="false" id="cov_wz_ill_ob" name="Covariance of (w2, z2)">
        <annotation>
  <fsk:parameter value="0.184"/>
        </annotation>
            </parameter>
      <parameter constant="false" id="Qillmean" name="Mean probability of illness for each simulation over all doses"/>
      <parameter constant="false" id="Qinfmean" name="Mean probability of infection for each simulation over all doses"/>
    </listOfParameters>
  </model>
</sbml>
