# Supplementary material
Source: publisher site journal article supplement (https://fesmj.pensoft.net/article/download/suppl/6071419/)
Supplement: Supplementary file 1 [file  › packages.json]

{"Language":"R","PackageList":[{"Package":"gsl","Version":"2.1-6"},{"Package":"ggplot2","Version":"3.3.1"},{"Package":"reshape2","Version":"1.4.4"},{"Package":"MASS","Version":"7.3-53.1"}]}
