# Supplementary material
Source: publisher site journal article supplement (https://fesmj.pensoft.net/article/download/suppl/6071419/)
Supplement: Supplementary file 1 [file  › sim.sedml]

<?xml version="1.0" encoding="UTF-8"?>
<sedML xmlns="http://sed-ml.org/" xmlns:math="http://www.w3.org/1998/Math/MathML" level="1" version="1">
  <!--This file was generated by jlibsedml, version 2.2.3.-->
  <annotation>
    <SelectedSimulation>0</SelectedSimulation>
  </annotation>
  <listOfSimulations>
    <steadyState id="steadyState" name="">
      <annotation>
        <sourceScript language="https://iana.org/assignments/mediatypes/text/x-r" src="./param.r" />
      </annotation>
      <algorithm kisaoID=" " />
    </steadyState>
  </listOfSimulations>
  <listOfModels>
    <model id="defaultSimulation" name="" language="https://iana.org/assignments/mediatypes/text/x-r" source="./model.r">
      <listOfChanges>
        <changeAttribute newValue="rep(1,10000)" target="dose" />
        <changeAttribute newValue="50" target="n_sim" />
        <changeAttribute newValue="1" target="Pexp" />
        <changeAttribute newValue="TRUE" target="challenge" />
        <changeAttribute newValue="-0.177" target="mean_w_inf_ch" />
        <changeAttribute newValue="0.054" target="mean_z_inf_ch" />
        <changeAttribute newValue="1.303" target="var_w_inf_ch" />
        <changeAttribute newValue="1.07" target="var_z_inf_ch" />
        <changeAttribute newValue="-0.041" target="cov_wz_inf_ch" />
        <changeAttribute newValue="-2.744" target="mean_w_ill_ch" />
        <changeAttribute newValue="-0.00489" target="mean_z_ill_ch" />
        <changeAttribute newValue="1.337" target="var_w_ill_ch" />
        <changeAttribute newValue="0.993" target="var_z_ill_ch" />
        <changeAttribute newValue="0.01" target="cov_wz_ill_ch" />
        <changeAttribute newValue="-0.226" target="mean_w_inf_ob" />
        <changeAttribute newValue="0.017" target="mean_z_inf_ob" />
        <changeAttribute newValue="1.404" target="var_w_inf_ob" />
        <changeAttribute newValue="1.003" target="var_z_inf_ob" />
        <changeAttribute newValue="-0.053" target="cov_wz_inf_ob" />
        <changeAttribute newValue="6.241" target="mean_w_ill_ob" />
        <changeAttribute newValue="-0.0086" target="mean_z_ill_ob" />
        <changeAttribute newValue="40.99" target="var_w_ill_ob" />
        <changeAttribute newValue="0.995" target="var_z_ill_ob" />
        <changeAttribute newValue="0.184" target="cov_wz_ill_ob" />
      </listOfChanges>
    </model>
    <model id="Outbreak" name="" language="https://iana.org/assignments/mediatypes/text/x-r" source="./model.r">
      <listOfChanges>
        <changeAttribute newValue="rep(1,10000)" target="dose" />
        <changeAttribute newValue="50" target="n_sim" />
        <changeAttribute newValue="1" target="Pexp" />
        <changeAttribute newValue="F" target="challenge" />
        <changeAttribute newValue="-0.177" target="mean_w_inf_ch" />
        <changeAttribute newValue="0.054" target="mean_z_inf_ch" />
        <changeAttribute newValue="1.303" target="var_w_inf_ch" />
        <changeAttribute newValue="1.07" target="var_z_inf_ch" />
        <changeAttribute newValue="-0.041" target="cov_wz_inf_ch" />
        <changeAttribute newValue="-2.744" target="mean_w_ill_ch" />
        <changeAttribute newValue="-0.00489" target="mean_z_ill_ch" />
        <changeAttribute newValue="1.337" target="var_w_ill_ch" />
        <changeAttribute newValue="0.993" target="var_z_ill_ch" />
        <changeAttribute newValue="0.01" target="cov_wz_ill_ch" />
        <changeAttribute newValue="-0.226" target="mean_w_inf_ob" />
        <changeAttribute newValue="0.017" target="mean_z_inf_ob" />
        <changeAttribute newValue="1.404" target="var_w_inf_ob" />
        <changeAttribute newValue="1.003" target="var_z_inf_ob" />
        <changeAttribute newValue="-0.053" target="cov_wz_inf_ob" />
        <changeAttribute newValue="6.241" target="mean_w_ill_ob" />
        <changeAttribute newValue="-0.0086" target="mean_z_ill_ob" />
        <changeAttribute newValue="40.99" target="var_w_ill_ob" />
        <changeAttribute newValue="0.995" target="var_z_ill_ob" />
        <changeAttribute newValue="0.184" target="cov_wz_ill_ob" />
      </listOfChanges>
    </model>
    <model id="ChallengeVarMeanDoses" name="" language="https://iana.org/assignments/mediatypes/text/x-r" source="./model.r">
      <listOfChanges>
        <changeAttribute newValue="10^rnorm(1000, -1, 1.5 )" target="dose" />
        <changeAttribute newValue="50" target="n_sim" />
        <changeAttribute newValue="1" target="Pexp" />
        <changeAttribute newValue="TRUE" target="challenge" />
        <changeAttribute newValue="-0.177" target="mean_w_inf_ch" />
        <changeAttribute newValue="0.054" target="mean_z_inf_ch" />
        <changeAttribute newValue="1.303" target="var_w_inf_ch" />
        <changeAttribute newValue="1.07" target="var_z_inf_ch" />
        <changeAttribute newValue="-0.041" target="cov_wz_inf_ch" />
        <changeAttribute newValue="-2.744" target="mean_w_ill_ch" />
        <changeAttribute newValue="-0.00489" target="mean_z_ill_ch" />
        <changeAttribute newValue="1.337" target="var_w_ill_ch" />
        <changeAttribute newValue="0.993" target="var_z_ill_ch" />
        <changeAttribute newValue="0.01" target="cov_wz_ill_ch" />
        <changeAttribute newValue="-0.226" target="mean_w_inf_ob" />
        <changeAttribute newValue="0.017" target="mean_z_inf_ob" />
        <changeAttribute newValue="1.404" target="var_w_inf_ob" />
        <changeAttribute newValue="1.003" target="var_z_inf_ob" />
        <changeAttribute newValue="-0.053" target="cov_wz_inf_ob" />
        <changeAttribute newValue="6.241" target="mean_w_ill_ob" />
        <changeAttribute newValue="-0.0086" target="mean_z_ill_ob" />
        <changeAttribute newValue="40.99" target="var_w_ill_ob" />
        <changeAttribute newValue="0.995" target="var_z_ill_ob" />
        <changeAttribute newValue="0.184" target="cov_wz_ill_ob" />
      </listOfChanges>
    </model>
    <model id="OutbreakVarMeanDoses" name="" language="https://iana.org/assignments/mediatypes/text/x-r" source="./model.r">
      <listOfChanges>
        <changeAttribute newValue="10^rnorm(1000, -1, 1.5 )" target="dose" />
        <changeAttribute newValue="50" target="n_sim" />
        <changeAttribute newValue="1" target="Pexp" />
        <changeAttribute newValue="F" target="challenge" />
        <changeAttribute newValue="-0.177" target="mean_w_inf_ch" />
        <changeAttribute newValue="0.054" target="mean_z_inf_ch" />
        <changeAttribute newValue="1.303" target="var_w_inf_ch" />
        <changeAttribute newValue="1.07" target="var_z_inf_ch" />
        <changeAttribute newValue="-0.041" target="cov_wz_inf_ch" />
        <changeAttribute newValue="-2.744" target="mean_w_ill_ch" />
        <changeAttribute newValue="-0.00489" target="mean_z_ill_ch" />
        <changeAttribute newValue="1.337" target="var_w_ill_ch" />
        <changeAttribute newValue="0.993" target="var_z_ill_ch" />
        <changeAttribute newValue="0.01" target="cov_wz_ill_ch" />
        <changeAttribute newValue="-0.226" target="mean_w_inf_ob" />
        <changeAttribute newValue="0.017" target="mean_z_inf_ob" />
        <changeAttribute newValue="1.404" target="var_w_inf_ob" />
        <changeAttribute newValue="1.003" target="var_z_inf_ob" />
        <changeAttribute newValue="-0.053" target="cov_wz_inf_ob" />
        <changeAttribute newValue="6.241" target="mean_w_ill_ob" />
        <changeAttribute newValue="-0.0086" target="mean_z_ill_ob" />
        <changeAttribute newValue="40.99" target="var_w_ill_ob" />
        <changeAttribute newValue="0.995" target="var_z_ill_ob" />
        <changeAttribute newValue="0.184" target="cov_wz_ill_ob" />
      </listOfChanges>
    </model>
  </listOfModels>
  <listOfTasks>
    <task id="task0" name="" modelReference="defaultSimulation" simulationReference="steadyState" />
    <task id="task1" name="" modelReference="Outbreak" simulationReference="steadyState" />
    <task id="task2" name="" modelReference="ChallengeVarMeanDoses" simulationReference="steadyState" />
    <task id="task3" name="" modelReference="OutbreakVarMeanDoses" simulationReference="steadyState" />
  </listOfTasks>
  <listOfDataGenerators>
    <dataGenerator id="Qillmean" name="">
      <math:math>
        <math:ci>Qillmean</math:ci>
      </math:math>
    </dataGenerator>
    <dataGenerator id="Qinfmean" name="">
      <math:math>
        <math:ci>Qinfmean</math:ci>
      </math:math>
    </dataGenerator>
  </listOfDataGenerators>
  <listOfOutputs>
    <plot2D id="plot1" name="">
      <annotation>
        <sourceScript language="https://iana.org/assignments/mediatypes/text/x-r" src="./visualization.r" />
      </annotation>
    </plot2D>
  </listOfOutputs>
</sedML>
